# Supplementary material for: Phenylboronic acid-modified nanoscale multi-arm polymers for tumor-targeted therapy
Source: Royal Society of Chemistry journal article supplement (doi:10.1039/d3bm00315a), 2023-01-01
Supplement: d3bm00315a1.pdf [file d3bm00315a1.pdf]

## Electronic Supplementary Information

### Phenylboronic acid-modified nanoscale multiarm polymers for tumor targeting therapy

*Chongzhi Wang<sup>a</sup>, YiKai Tang<sup>a</sup>, Yang Yuan<sup>a</sup>, Cheng Li<sup>a</sup>, Wei Wu<sup>\*a</sup> and Xiqun Jiang<sup>\*a</sup>*

<sup>a</sup>Department of Polymer Science & Engineering, College of Chemistry & Chemical Engineering, and Jiangsu Key Laboratory for Nanotechnology, Nanjing University, Nanjing, 210023, P.R. China.

\* To whom correspondence should be addressed: [jiangx@nju.edu.cn](mailto:jiangx@nju.edu.cn);  
[wuwei@nju.edu.cn](mailto:wuwei@nju.edu.cn).

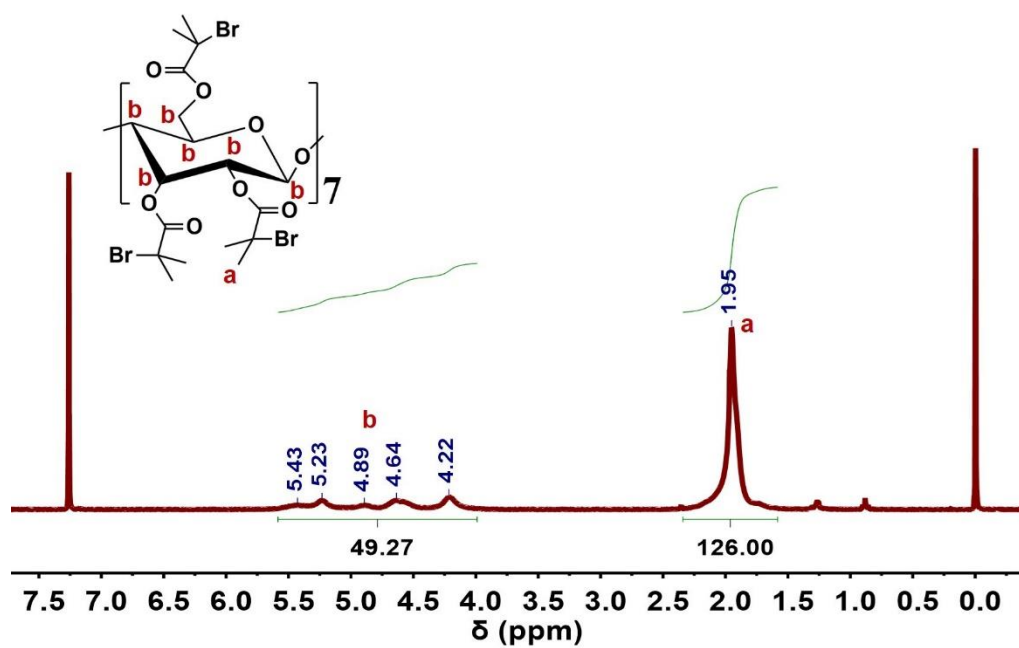

**Figure S1.** <sup>1</sup>H NMR spectrum of 21Br-β-CD in CDCl<sub>3</sub>.

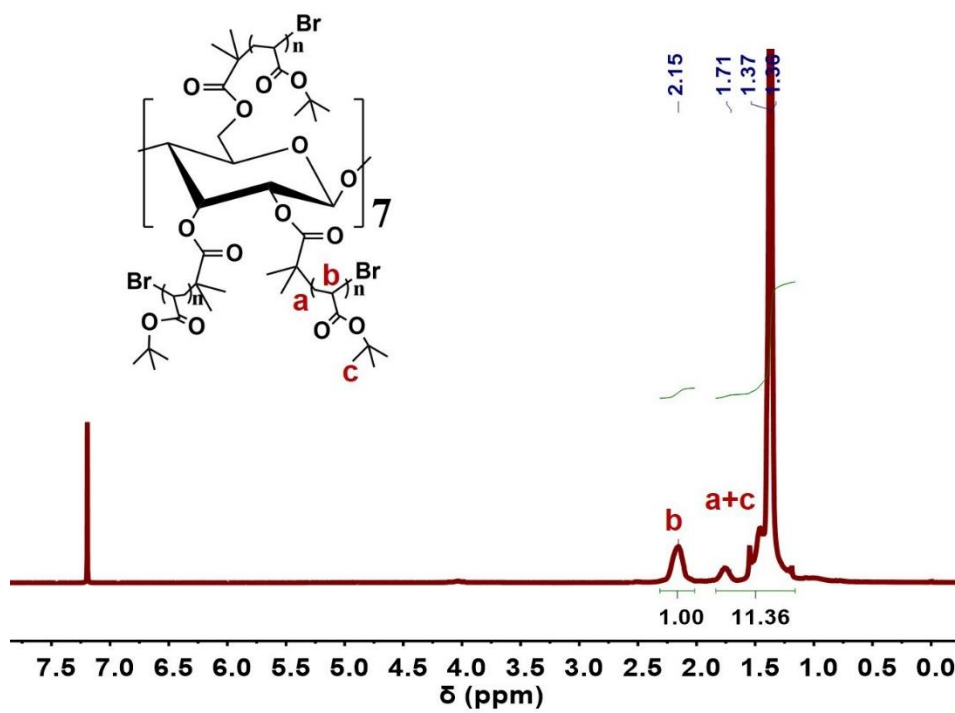

**Figure S2.**  $^1\text{H}$  NMR spectrum of  $\beta\text{-CD}-(\text{PTBA})_{21}$  in  $\text{CDCl}_3$ .

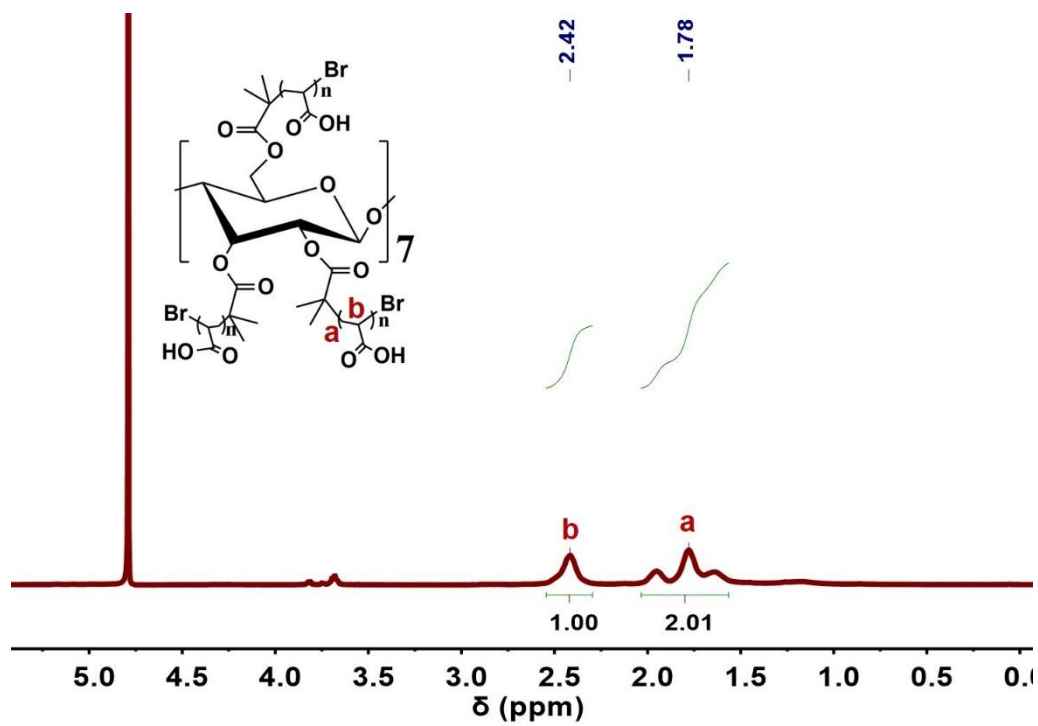

**Figure S3.**  $^1\text{H}$  NMR spectrum of  $\beta\text{-CD-(PAA)}_{21}$  in  $\text{D}_2\text{O}$ .

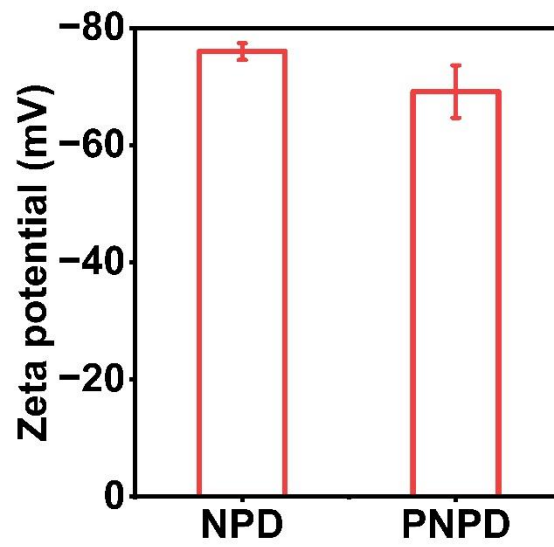

**Figure S4.** Zeta potentials of NPD and PNPD in PBS (pH = 7.4) (n=5, mean  $\pm$  SD).

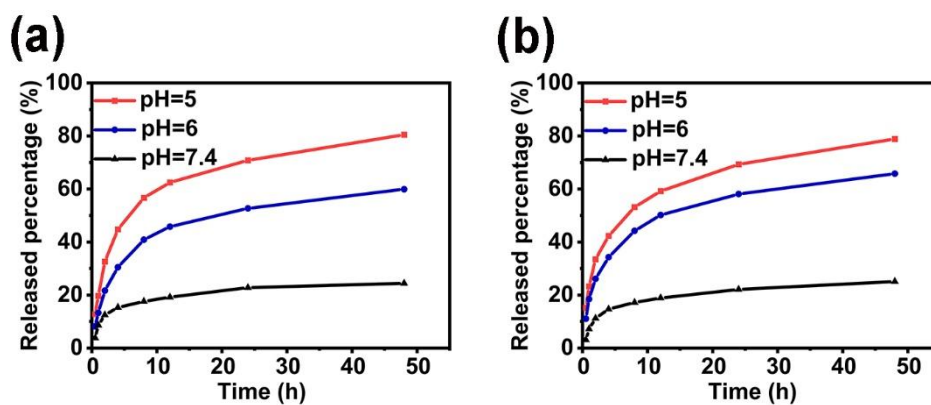

**Figure S5.** (a-b) DOX release profiles from NPD (a) and PNPD (b) in different pH conditions.

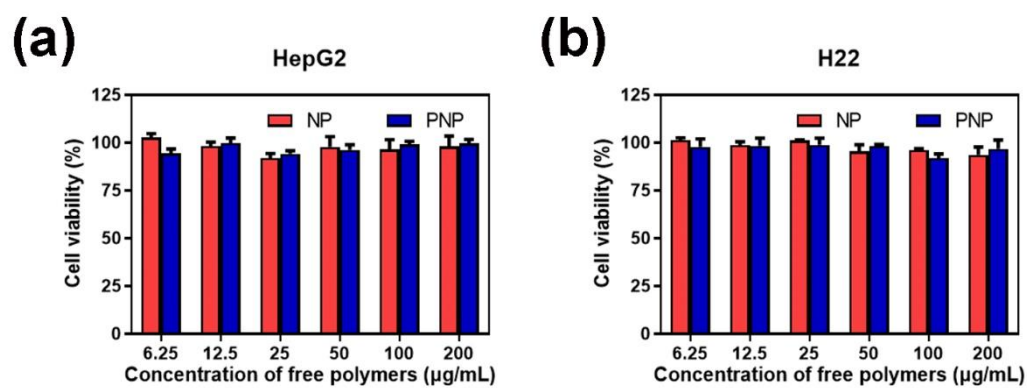

**Figure S6.** (a-b) Cytotoxicity of NP and PNP against HepG2 (a) and H22 (b) cells (n=3, mean  $\pm$  SD).

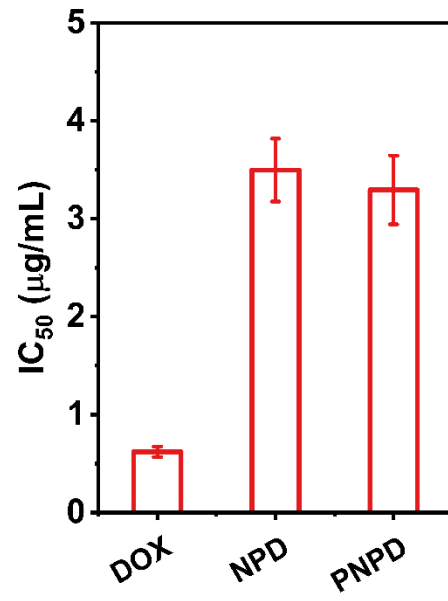

**Figure S7.** IC<sub>50</sub> of different samples calculated from MTT data.



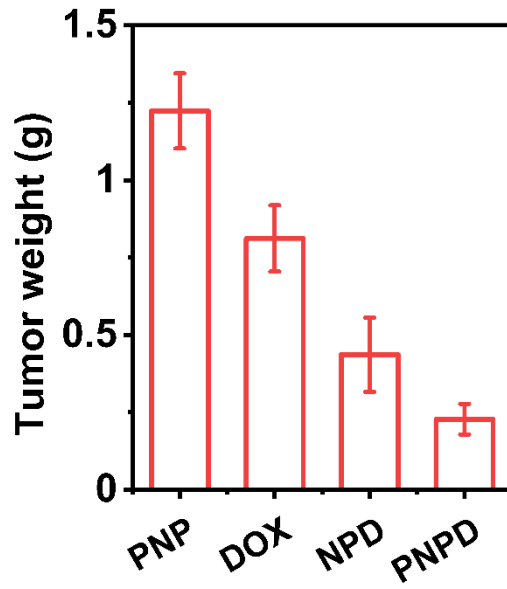

**Figure S8.** Average tumor weights on the 10th day after the different treatments as indicated (n=5, mean  $\pm$  SD).
